# Supplementary material for: Emerging investigator series: connecting concepts of coinage metal stability across length scales
Source: Royal Society of Chemistry journal article supplement (doi:10.1039/c9en00407f), 2019-01-01
Supplement: c9en00407f1.pdf [file c9en00407f1.pdf]

---

Supporting Information

## Connecting Concepts of Coinage Metal Stability Across Length Scales

Kathryn A. Johnston,<sup>†</sup> Lisa M. Stabryla,<sup>‡</sup> Leanne M. Gilbertson,<sup>‡</sup> and Jill E. Millstone<sup>†\*</sup>

<sup>†</sup>Department of Chemistry, University of Pittsburgh, 219 Parkman Avenue, Pittsburgh, PA 15260, United States

<sup>‡</sup>Department of Civil and Environmental Engineering, University of Pittsburgh, 3700 O'Hara Street, Pittsburgh, PA, 15261, United States

---

### Table of Contents:

|                                                                       |       |
|-----------------------------------------------------------------------|-------|
| <b>Table S1.</b> Surface area-normalized Ag(I) ion release data.....  | P. S2 |
| <b>Table S2.</b> Effects of small molecules on Ag(I) ion release..... | P. S4 |
| <b>Table S3.</b> Effects of NOM on Ag(I) ion release.....             | P. S5 |
| <b>References</b> .....                                               | P. S6 |

**Table S1.** Compilation of data from papers that report Ag(I) ion release as a function of AgNP size. Also shown are calculations of the surface area-normalized Ag(I) ion release, where the Ag(I) ion release is shown in units of mg/m<sup>2</sup>. In many cases, the Ag(I) ion release trends reported in these papers are as a function of AgNP diameter, and the general trend is that as the AgNP diameter decreases, the Ag(I) ion release increases. However, when examining these trends in terms of exposed surface area, some studies find that as the exposed surface area increases, the Ag(I) ion release also increases, but others find that as the exposed surface area increases, the Ag(I) ion release decreases. These discrepancies could be due to factors such as particle aggregation or coalescence as a function of time.

| Reference # from main text | Conditions <sup>a</sup>   | AgNP diameter (nm)      | Initial [Ag] (ppm) | % Ag(I) ion release | [Ag(I)] released (ppm) | Total surface area per liter (m <sup>2</sup> /L) | Surface area-normalized Ag(I) ion release (mg/m <sup>2</sup> ) |
|----------------------------|---------------------------|-------------------------|--------------------|---------------------|------------------------|--------------------------------------------------|----------------------------------------------------------------|
| 160                        | GA-AgNPs                  | 5.5                     | 5                  | 51                  | 2.55                   | 0.52                                             | 4.93                                                           |
|                            |                           | 22.8                    |                    | 5.8                 | 0.29                   | 0.12                                             | 2.32                                                           |
|                            | PVP-AgNPs                 | 4.7                     |                    | 62.9                | 3.15                   | 0.61                                             | 5.20                                                           |
|                            |                           | 8.4                     |                    | 14.5                | 0.73                   | 0.34                                             | 2.14                                                           |
|                            |                           | 26.3                    |                    | 6                   | 0.30                   | 0.11                                             | 2.77                                                           |
|                            |                           | 38.2                    |                    | 4.1                 | 0.21                   | 0.07                                             | 2.75                                                           |
| 184                        | Acetate buffer, 24 hrs    | 4.8                     | 0.05               | 85                  | 0.043                  | 5.9E-3                                           | 7.17                                                           |
|                            |                           | 60                      | 0.05               | 47.4                | 0.024                  | 4.74E-4                                          | 49.99                                                          |
|                            |                           | Foil (4 x 4 x 0.127 mm) | 10,700             | 1.10E-5             | 1.18E-3                | 0.02                                             | 0.069                                                          |
| 186                        | Aerobic, 120 hrs          | 4.7                     | 2                  | N/A                 | 2.12                   | 0.24                                             | 8.77                                                           |
|                            |                           | 10.5                    |                    | N/A                 | 1.25                   | 0.11                                             | 11.57                                                          |
| 195                        | 28 days                   | 4                       | 40                 | 69.5                | 27.8                   | 5.69                                             | 4.89                                                           |
|                            |                           | 6.1                     |                    | 47                  | 18.8                   | 3.73                                             | 5.04                                                           |
|                            |                           | 8.7                     |                    | 21.3                | 8.52                   | 2.62                                             | 3.26                                                           |
| 197                        | pH 7.3, 35 days           | 4.9                     | 9.8                | N/A                 | 2.17                   | 1.14                                             | 1.91                                                           |
|                            |                           | 9.5                     | 10.5               | N/A                 | 0.24                   | 0.63                                             | 0.37                                                           |
|                            |                           | 19.8                    | 10.4               | N/A                 | 0.19                   | 0.30                                             | 0.64                                                           |
| 198                        | H <sub>2</sub> O, 80 days | 6.2                     | 7.92               | 15                  | 1.19                   | 0.73                                             | 1.63                                                           |
|                            |                           | 9.2                     |                    | 5.8                 | 0.46                   | 0.49                                             | 0.94                                                           |
|                            |                           | 12.9                    |                    | 3.3                 | 0.26                   | 0.35                                             | 0.75                                                           |
|                            |                           | 70.5                    |                    | 0.4                 | 0.03                   | 0.06                                             | 0.50                                                           |
|                            | Acetic acid, 27-34 days   | 6.2                     |                    | 41.3                | 3.27                   | 0.73                                             | 4.50                                                           |
|                            |                           | 9.2                     |                    | 20.9                | 1.65                   | 0.49                                             | 3.38                                                           |
|                            |                           | 12.9                    |                    | 13.6                | 1.08                   | 0.35                                             | 3.08                                                           |
|                            |                           | 70.5                    |                    | 6.9                 | 0.55                   | 0.06                                             | 8.55                                                           |
| 199                        | UPW, 4 hrs                | 11.6                    | 1                  | 1.3                 | 0.013                  | 0.05                                             | 0.27                                                           |
|                            |                           | 17.8                    |                    | 1.4                 | 0.014                  | 0.03                                             | 0.44                                                           |
|                            |                           | 47.7                    |                    | 0.7                 | 7E-3                   | 0.012                                            | 0.59                                                           |
|                            |                           | 56.5                    |                    | 0.6                 | 6E-3                   | 0.010                                            | 0.60                                                           |
|                            |                           | 94.8                    |                    | 0.6                 | 6E-3                   | 0.006                                            | 1.00                                                           |
| 200                        |                           | 20                      | 12.7               | 4.5                 | 0.57                   | 0.36                                             | 1.58                                                           |

|     |                             |      |      |      |      |        |        |
|-----|-----------------------------|------|------|------|------|--------|--------|
|     | BEGM, PVP-AgNPs, 24 hrs     | 110  |      | 2.5  | 0.32 | 0.07   | 4.83   |
|     | BEGM, citrate-AgNPs, 24 hrs | 20   |      | 4.3  | 0.55 | 0.36   | 1.51   |
|     |                             | 110  |      | 2.2  | 0.28 | 0.07   | 4.25   |
| 201 | Low initial [Ag]            | 20   | 0.2  | N/A  | 0.04 | 6E-3   | 7.03   |
|     |                             | 80   | 1    | N/A  | 0.06 | 7E-3   | 8.44   |
|     | Middle initial [Ag]         | 20   | 0.83 | N/A  | 0.15 | 0.024  | 6.35   |
|     |                             | 80   | 2.1  | N/A  | 0.1  | 0.015  | 6.70   |
|     | High initial [Ag]           | 20   | 1.4  | N/A  | 0.5  | 0.04   | 12.55  |
|     |                             | 80   | 3.4  | N/A  | 0.16 | 0.024  | 6.62   |
| 202 | PVP-AgNPs, R2, 115 days     | 6.5  | 1    | 79.1 | 0.79 | 0.09   | 9.04   |
|     |                             | 53.4 |      | 27.7 | 0.28 | 0.01   | 26     |
|     | PVP-AgNPs, lake, 99 days    | 6.5  |      | 85.7 | 0.86 | 0.09   | 9.79   |
|     | 53.4                        | 7.2  |      | 0.07 | 0.01 | 6.76   |        |
| 204 | Low initial [Ag], 337 days  | 19.9 | 0.3  | N/A  | 0.12 | 9E-3   | 14.22  |
|     |                             | 40   |      | N/A  | 0.07 | 4.3E-3 | 15.44  |
|     |                             | 80   |      | N/A  | 0.03 | 2.1E-3 | 14.53  |
|     | High initial [Ag], 337 days | 19.9 | 0.6  | N/A  | 0.18 | 0.02   | 10.20  |
|     |                             | 40   |      | N/A  | 0.12 | 9E-3   | 14.29  |
|     |                             | 80   |      | N/A  | 0.05 | 4.3E-3 | 11.53  |
| 206 | Citrate-AgNPs, 24 hrs       | 10   | 10   | 23.7 | 2.37 | 0.57   | 4.17   |
|     |                             | 40   |      | 7    | 0.7  | 0.14   | 4.92   |
|     |                             | 75   |      | 6.6  | 0.66 | 0.08   | 8.70   |
| 207 | 28 hrs                      | 30   | 5    | 51.5 | 2.58 | 0.09   | 27.15  |
|     |                             | 160  |      | 40.4 | 2.02 | 0.018  | 113.61 |
|     |                             | 460  |      | 29.2 | 1.46 | 6E-3   | 236.08 |
| 208 | GA-AgNPs, 24.5 hrs          | 5    | 3.21 | 26.8 | 0.86 | 0.37   | 2.36   |
|     |                             | 22   |      | 2.7  | 0.09 | 0.08   | 1.04   |
|     | PVP-AgNPs, 24 hrs           | 8    |      | 1.6  | 0.05 | 0.23   | 0.22   |
|     |                             | 38   |      | 3.1  | 0.10 | 0.05   | 2.07   |
| 209 | LB, 24 hrs                  | 9.1  | 12.5 | 7    | 0.88 | 0.78   | 1.12   |
|     |                             | 19.1 |      | 5.7  | 0.71 | 0.37   | 1.91   |
|     |                             | 43.5 |      | 4.7  | 0.59 | 0.16   | 3.59   |

<sup>a</sup>Abbreviations: Luria-Bertani broth (LB), gum arabic (GA), polyvinylpyrrolidone (PVP), ultra pure water (UPW), bronchial epithelial cell growth medium (BEGM), river water (R2)

**Table S2.** Compilation of data from papers that report Ag(I) ion release in the presence of additional small molecules in solution. Also shown are estimates of the small molecule:Ag mole ratios and the conclusions reached in these papers about how the small molecules impact Ag(I) ion release. A low molecule:Ag mole ratio does not always lead to increased Ag(I) ion release and vice versa. These discrepancies may be due to variation in the affinities of these molecules for Ag(I) ions or the reduced metal NP surface, or interactions of the molecules with one another, among other possibilities.

| Reference # from main text | Initial [Ag] | Molecule <sup>a</sup> | [Molecule] <sup>b</sup> | Molecule:Ag mole ratio (low) <sup>c</sup> | Molecule:Ag mole ratio (high) <sup>c</sup> | Paper conclusion  |
|----------------------------|--------------|-----------------------|-------------------------|-------------------------------------------|--------------------------------------------|-------------------|
| 184                        | 2 mg/L       | cysteine, glutathione | 0.00005 – 1 mM          | 0.003                                     | 53.5                                       | Decreased release |
| 185                        | 0.35 g/L     | cysteine              | 1 g/L                   | 2.52                                      | N/A                                        | Decreased release |
| 267                        | 5 μM         | cysteine              | 1000, 10,000 nM         | 0.2                                       | 2                                          | Increased release |
| 272                        | 27.8 μM      | glutathione           | 16.7, 83.3, 416.3 μM    | 0.6                                       | 15                                         | Increased release |
| 293                        | 171 μg/L     | citrate               | 50 mg C/L               | 2607                                      | N/A                                        | Decreased release |
| 313                        | 8 μM         | cysteine              | 400 μM                  | 50                                        | N/A                                        | Increased release |
| 316                        | 370 μM       | glutathione           | 370 μM                  | 1                                         | N/A                                        | Increased release |
| 317                        | 5 μM         | cysteine              | 0.2, 0.5, 2, 5 μM       | 0.04                                      | 1                                          | Decreased release |
| 318                        | Not reported | cysteine              | 0.1, 1, 10 mg/L         | Not reported                              | Not reported                               | Decreased release |
| 319                        | 1.6 mg/mL    | EDTA                  | 0 – 800 mg/L            | 0.002                                     | 0.18                                       | Decreased release |
| 320                        | 500 μg/L     | cysteine              | 0.1 – 10 μM             | 0.02                                      | 2.14                                       | Decreased release |

<sup>a</sup>Abbreviation: ethylenediaminetetraacetic acid (EDTA)

<sup>b</sup>In some papers, these concentrations are reported in milligrams of carbon per liter. Where these units were reported, the molecule:Ag calculations done here used the molecular weight of carbon. Where these units were not used or the units were not specified, we assumed that the reported concentrations were in terms of the overall small molecule, so the molecule:Ag calculations were done using the molecular weights of the small molecules.

<sup>c</sup>Where there was more than one concentration of small molecule reported, we evaluate the small molecule:Ag ratio for the lowest and highest small molecule concentrations. Where only one concentration of small molecule was reported, we calculate only one small molecule:Ag ratio.

**Table S3.** Compilation of data from papers that report Ag(I) ion release in the presence of NOM in solution. Also shown are estimations of the NOM:Ag mole ratios and the conclusions reached in these papers about how NOM impacts Ag(I) ion release. Some of these papers seem to observe a trend where a low NOM:Ag mole ratio leads to increased Ag(I) ion release and a high NOM:Ag mole ratio leads to decreased Ag(I) ion release.

| Reference # from main text | Initial [Ag] | NOM type <sup>a</sup> | [NOM] <sup>b</sup> | NOM:Ag mole ratio (low) <sup>c</sup> | NOM:Ag mole ratio (high) <sup>c</sup> | Paper conclusion  |
|----------------------------|--------------|-----------------------|--------------------|--------------------------------------|---------------------------------------|-------------------|
| 187                        | 0.05 mg/L    | SRHA                  | 5 – 50 mg/L        | 10.7                                 | 107                                   | Decreased release |
| 216                        | 5 mg/L       | PLFA <sup>d</sup>     | 600 mg/L           | 9.9                                  | N/A                                   | Decreased release |
| 224                        | 2.8 µg/L     | SRDOC                 | 1.46 mg C/L        | 4649                                 | N/A                                   | Decreased release |
| 224                        | 11.5 µg/L    | SRDOC                 | 10.43 mg C/L       | 8087                                 | N/A                                   | Decreased release |
| 293                        | 171 µg/L     | SRFA                  | 300 mg C/L         | 15,643                               | N/A                                   | Decreased release |
| 318                        | Not reported | DOC                   | 10 – 25 mg/L       | Not reported                         | Not reported                          | Increased release |
| 319                        | 1 mg/mL      | alginate              | 2 – 333 mg C/L     | 0.018                                | 3                                     | Decreased release |
| 321                        | 5 mg/L       | PLFA                  | 1 – 10 mg C/L      | 0.2                                  | 2                                     | Increased release |
| 322                        | 1 mg/L       | BSA                   | 600 mg/L           | 0.97                                 | N/A                                   | Increased release |
| 322                        | 1.6 mg/L     | alginate <sup>e</sup> | 600 mg/L           | 0.1                                  | 4                                     | Decreased release |
| 323                        | 100 µg/L     | PLFA <sup>d</sup>     | 30 mg/L            | 24.7                                 | N/A                                   | Increased release |
| 324                        | 1 mg/L       | Suwanee River NOM     | 10 – 80 mg/L       | 1.07                                 | 8.56                                  | Decreased release |

<sup>a</sup>Abbreviations: Pony Lake fulvic acid (PLFA), bovine serum albumin (BSA), dissolved organic carbon (DOC), Suwanee River humic acid (SRHA), Suwanee River dissolved organic carbon (SRDOC), Suwanee River fulvic acid (SRFA)

<sup>b</sup>It is most common for the concentrations of these NOM molecules to be reported in milligrams of carbon per liter. Where these units were reported, the NOM:Ag calculations done here used the molecular weight of carbon. Where these units were not used or the units were not specified, we assumed that the reported concentrations were in terms of the overall NOM species, so the NOM:Ag calculations were done using estimated molecular weights of the NOM species.

<sup>c</sup>Where there was more than one concentration of NOM reported, we evaluate the NOM:Ag ratio for the lowest and highest NOM concentrations. Where only one concentration of NOM was report, we calculate only one NOM:Ag ratio.

<sup>d</sup>PLFA molecular weight  $\approx$  1300 Da<sup>1</sup>

<sup>e</sup>Alginate molecular weight = 10,000 – 600,000 Da

## References

1. A. Brown, D. M. McKnight, Y.-P. Chin, E. C. Roberts and M. Uhle, Chemical characterization of dissolved organic material in Pony Lake, a saline coastal pond in Antarctica, *Mar. Chem.*, 2004, **89**, 327-337.
